# Supplementary material for: Identifying differential networks based on multi-platform gene expression data
Source: Royal Society of Chemistry journal article supplement (doi:10.1039/c6mb00619a), 2016-11-11
Supplement: c6mb00619a1.pdf [file c6mb00619a1.pdf]

# Identifying differential networks based on multi-platform gene expression data

Le Ou-Yang, Hong Yan and Xiao-Fei Zhang

## 1 Supplementary Figures

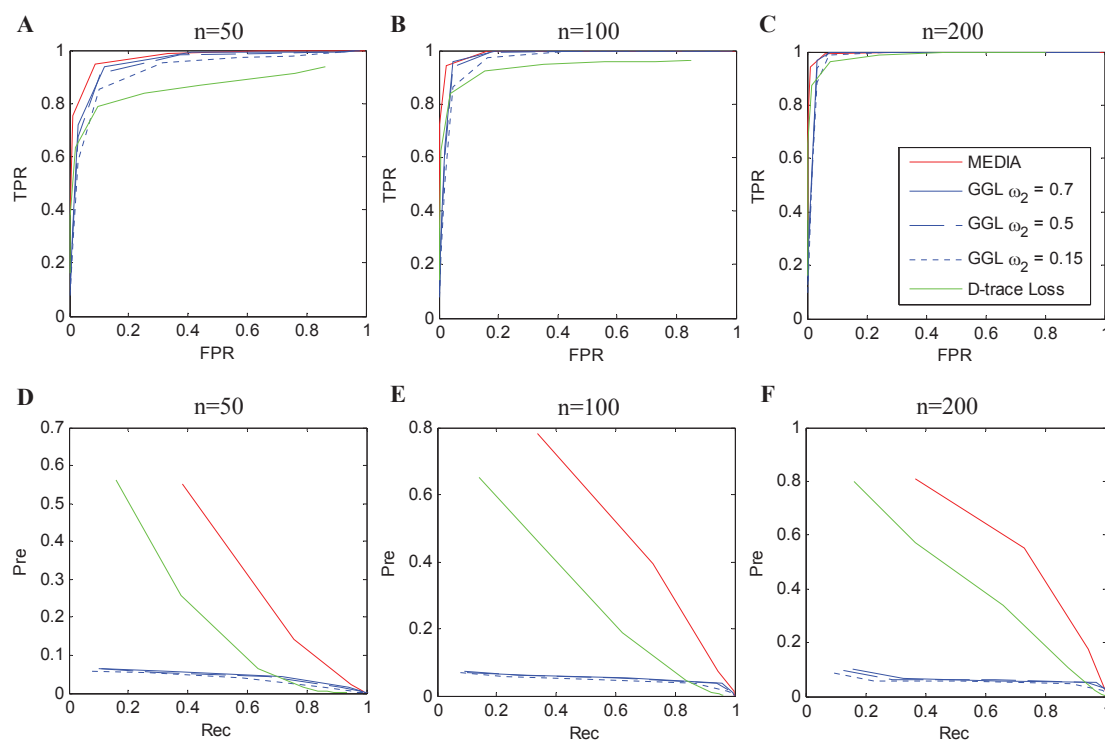

Figure S1: Performance of different methods on simulated data (Simulation 2) with  $p = 100$ ,  $K = 3$  and  $n_x = n_y = 50, 100, 200$ . (A-C) are ROC curves. (D-F) are precision-recall curves. Red line: MEDIA; blue line: grouped graphical lasso (GGL); green line: D-trace loss estimator. For GGL, each colored curve corresponds to a fixed value of  $\omega_2$ , with the value of  $\omega_1$  varied. Each curve is averaged over 100 random generations of the data.

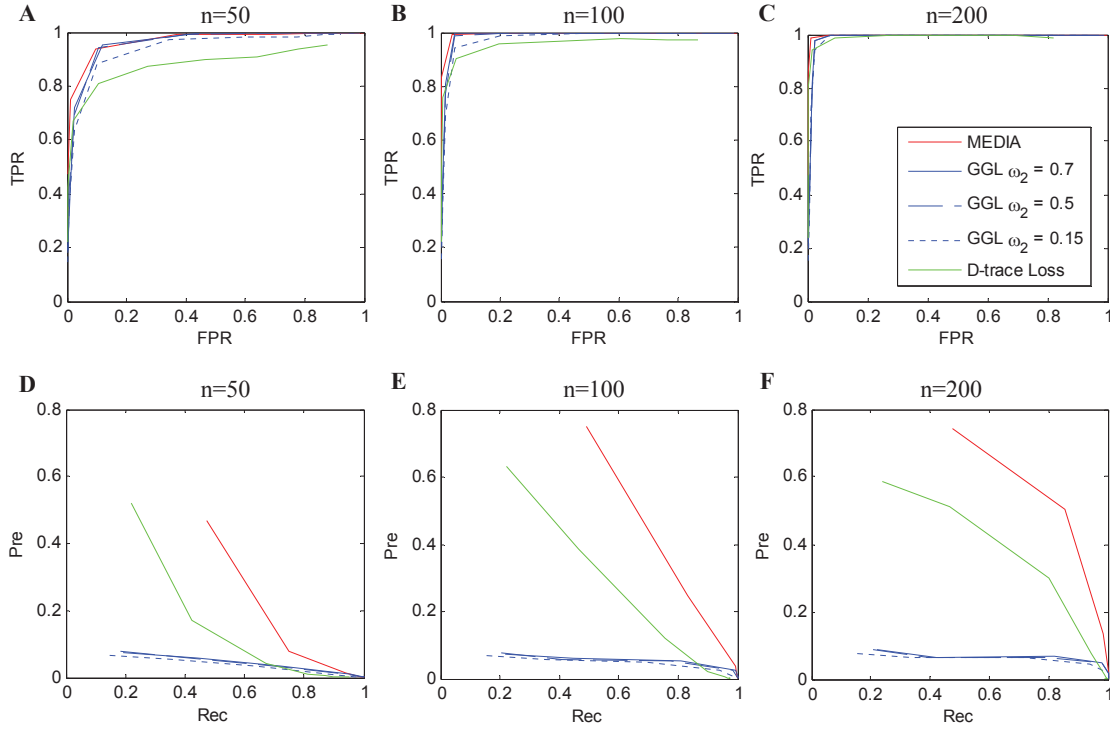

Figure S2: Performance of different methods on simulated data (Simulation 3) with  $p = 100$ ,  $K = 3$  and  $n_x = n_y = 50, 100, 200$ . (A-C) are ROC curves. (D-F) are precision-recall curves. Red line: MEDIA; blue line: grouped graphical lasso (GGL); green line: D-trace loss estimator. For GGL, each colored curve corresponds to a fixed value of  $\omega_2$ , with the value of  $\omega_1$  varied. Each curve is averaged over 100 random generations of the data.

## 2 Supplementary Text

### 2.1 Algorithm for parameter estimation

In this section, we solve the optimization problem in the main text by using an alternating direction method of multipliers (ADMM) [1]. We first introduce  $K$  auxiliary matrices  $\{\tilde{\Delta}\} = \{\tilde{\Delta}_k\}_{k=1}^K$  and rewrite the objective function as

$$\begin{cases} \min_{\substack{\Delta_k = \Delta_k^T \\ k=1, \dots, K}} L_D(\{\Delta\}, \{\hat{\Sigma}_X\}, \{\hat{\Sigma}_Y\}) + \lambda P(\{\tilde{\Delta}\}) \\ \text{subject to } \Delta_k = \tilde{\Delta}_k, \quad k = 1, \dots, K. \end{cases} \quad (1)$$

From (1), we consider the following augmented Lagrangian function:

$$\begin{aligned} L(\{\Delta\}, \{\tilde{\Delta}\}, \{A\}) &= L_D(\{\Delta\}, \{\hat{\Sigma}_X\}, \{\hat{\Sigma}_Y\}) + \lambda P(\{\tilde{\Delta}\}) \\ &\quad + \sum_{k=1}^K \langle A_k, \Delta_k - \tilde{\Delta}_k \rangle + (\rho/2) \sum_{k=1}^K \|\Delta_k - \tilde{\Delta}_k\|_F^2. \end{aligned} \quad (2)$$

where  $\{A\} = A_1, \dots, A_K$  are dual variables and  $\rho$  serves as a penalty parameter. Given the solution  $(\{\Delta^t\}, \{\tilde{\Delta}^t\}, \{A^t\})$  at the  $t$ -th step ( $t = 1, 2, \dots$ ), we update  $(\{\Delta^{t+1}\}, \{\tilde{\Delta}^{t+1}\}, \{A^{t+1}\})$  as follows:

$$\{\Delta_k^{t+1}\}_{k=1}^K = \arg \min_{\substack{\Delta_k = \Delta_k^T \\ k=1, \dots, K}} L(\{\Delta\}, \{\tilde{\Delta}^t\}, \{A^t\}) \quad (3)$$

$$\{\tilde{\Delta}_k^{t+1}\}_{k=1}^K = \arg \min_{\substack{\tilde{\Delta}_k = \tilde{\Delta}_k^T \\ k=1, \dots, K}} L(\{\Delta^{t+1}\}, \{\tilde{\Delta}\}, \{A^t\}) \quad (4)$$

$$A_k^{t+1} = A_k^t + \rho(\Delta_k^{t+1} - \tilde{\Delta}_k^{t+1}), \quad k = 1, \dots, K. \quad (5)$$

In particular, updating  $\Delta_k$ ,  $k = 1, \dots, K$  by minimizing  $L(\{\Delta\}, \{\tilde{\Delta}^t\}, \{A^t\})$  is equivalent to solving the following optimization problem:

$$\Delta_k^{t+1} = \arg \min_{\Delta_k = \Delta_k^T} \frac{1}{2} \left\langle \Delta_k^2, (\hat{\Sigma}_X^k \hat{\Sigma}_Y^k + \hat{\Sigma}_Y^k \hat{\Sigma}_X^k)/2 + \rho I \right\rangle - \left\langle \Delta_k, \hat{\Sigma}_X^k - \hat{\Sigma}_Y^k + \rho \tilde{\Delta}_k^t - A_k^t \right\rangle. \quad (6)$$

where  $I$  is a  $p \times p$  identity matrix. According to Theorem 1 of [3], the explicit solution to (6) is given by  $\Delta_k^{t+1} = G\left((\hat{\Sigma}_X^k \hat{\Sigma}_Y^k + \hat{\Sigma}_Y^k \hat{\Sigma}_X^k)/2 + \rho I, \hat{\Sigma}_X^k - \hat{\Sigma}_Y^k + \rho \tilde{\Delta}_k^t - A_k^t\right)$ , where  $G(\Psi, \Phi) = U_\Psi\{(U_\Psi^T \Phi U_\Psi) \circ C\}U_\Psi^T$ , and  $\Psi = U_\Psi \Sigma_\Psi U_\Psi^T$  is the eigenvalue decomposition of  $\Psi$ , with ordered eigenvalues  $\sigma_1 \geq \dots \geq \sigma_p$ ,  $\circ$  denotes the Hadamard product of matrices and  $C_{ij} = 2/(\sigma_i + \sigma_j)$ .

Updating  $\tilde{\Delta}_k, k = 1, \dots, K$  by minimizing  $L(\{\Delta^{t+1}\}, \{\tilde{\Delta}\}, \{A^t\})$  is equivalent to solving the following optimization problem:

$$\{\tilde{\Delta}_k^{t+1}\}_{k=1}^K = \arg \min_{\substack{\tilde{\Delta}_k = \tilde{\Delta}_k^T \\ k=1, \dots, K}} \frac{\rho}{2} \sum_{k=1}^K \|\tilde{\Delta}_k - \Delta_k^{t+1} - A_k^t/\rho\|_F^2 + \lambda \sum_{i \neq j} \left( \sum_{k=1}^K (\tilde{\Delta}_k)_{ij}^2 \right)^{\frac{1}{2}}. \quad (7)$$

Similar to [2], for all  $i = 1, \dots, p$  and  $k = 1, \dots, K$ , the solution to problem (7) has  $(\tilde{\Delta}_k)_{ii} = (\Delta_k^{t+1} + A_k^t/\rho)_{ii}$ . While the off-diagonal elements take the form

$$(\tilde{\Delta}_k^{t+1})_{ij} = (B_k)_{ij} \left( 1 - \frac{\lambda}{\rho \left\{ \sum_{k=1}^K (B_k)_{ij}^2 \right\}^{\frac{1}{2}}} \right)_+ \quad (8)$$

where  $B_k = \Delta_k^{t+1} + A_k^t/\rho$ . Based on the analysis above, the complete ADMM algorithm is summarized in Algorithm 1. This algorithm can be accelerated by adaptively changing  $\rho$ . We set  $\rho = 0.1$  and increase it iteratively by scaling it to  $u\rho$ . Here, we set  $u = 1.05$ . In the implementation of the algorithm, the convergence condition is

$$\sum_{k=1}^K \|\Delta_k^{t+1} - \Delta_k^t\| < \varepsilon \cdot \max(1, \sum_{k=1}^K \|\Delta_k^t\|, \sum_{k=1}^K \|\Delta_k^{t+1}\|). \quad (9)$$

where  $\varepsilon$  is a tolerance which is set to  $10^{-3}$  in our experiments.

---

**Algorithm 1** ADMM algorithm for the multi-view differential network analysis model.

---

**Input:**

sample covariance matrices  $\{\hat{\Sigma}_X\}$  and  $\{\hat{\Sigma}_Y\}$ , parameter  $\lambda$ .

**Initialize:**

$t = 0, A_k^0 = 0, \Delta_k^0 = \tilde{\Delta}_k^0 = I, k = 1, \dots, K, \rho = 0.1, u = 1.05, \max_\rho = 10^{10}, \varepsilon = 10^{-3}$ .

**while** (not converged) **do**

- 1:  $t = t + 1$ ;
- 2: fix the others and update  $\Delta_k, k = 1, \dots, K$  by  $\Delta_k^{t+1} = G\left((\hat{\Sigma}_X^k \hat{\Sigma}_Y^k + \hat{\Sigma}_Y^k \hat{\Sigma}_X^k)/2 + \rho I, \hat{\Sigma}_X^k - \hat{\Sigma}_Y^k + \rho \tilde{\Delta}_k^t - A_k^t\right)$
- 3: fix the others and update  $\tilde{\Delta}_k, k = 1, \dots, K$  by  $(\tilde{\Delta}_k^{t+1})_{ij} = (B_k)_{ij} \left( 1 - \frac{\lambda}{\rho \left\{ \sum_{k=1}^K (B_k)_{ij}^2 \right\}^{\frac{1}{2}}} \right)_+$ ;
- 4: update the multipliers  $A_k^{t+1} = A_k^t + \rho(\Delta_k^{t+1} - \tilde{\Delta}_k^{t+1}), k = 1, \dots, K$
- 5: update the parameter  $\rho$  by  $\rho = \min(u\rho, \max_\rho)$
- 6: check the convergence conditions  $\sum_{k=1}^K \|\Delta_k^{t+1} - \Delta_k^t\| < \varepsilon \cdot \max(1, \sum_{k=1}^K \|\Delta_k^t\|, \sum_{k=1}^K \|\Delta_k^{t+1}\|)$ .

**end while**

---

## References

- [1] Stephen Boyd, Neal Parikh, Eric Chu, Borja Peleato, and Jonathan Eckstein. Distributed optimization and statistical learning via the alternating direction method of multipliers. *Foundations and Trends® in Machine Learning*, 3(1):1–122, 2011.
- [2] Patrick Danaher, Pei Wang, and Daniela M Witten. The joint graphical lasso for inverse covariance estimation across multiple classes. *Journal of the Royal Statistical Society: Series B (Statistical Methodology)*, 76(2):373–397, 2014.
- [3] TENG ZHANG and HUI ZOU. Sparse precision matrix estimation via lasso penalized d-trace loss. *Biometrika*, 101(1):103–120, 2014.
